# Supplementary material
Source: PubMed Central journal article supplement (PMC4023812)
Supplement: NIHMS568324-supplement-01.pdf [file NIHMS568324-supplement-01.pdf]

Table S1

A

| Probe set    | Gene name                                                                                                     | Ratio        | P value         |
|--------------|---------------------------------------------------------------------------------------------------------------|--------------|-----------------|
| 202718_at    | <b>insulin-like growth factor binding protein 2, 36kDa</b>                                                    | <b>59,68</b> | <b>6,07E-10</b> |
| 201427_s_at  | selenoprotein P, plasma, 1                                                                                    | 14.21        | 2,15E-07        |
| 201069_at    | matrix metalloproteinase 2 (gelatinase A, 72kDa gelatinase, 72kDa type IV collagenase)                        | 8.94         | 8,23E-08        |
| 236738_at    | Similar to LOC166075                                                                                          | 8.82         | 7,92E-07        |
| 228011_at    | family with sequence similarity 92, member A2; family with sequence similarity 92, member A1                  | 8,08         | 1,18E-06        |
| 204030_s_at  | schwannomin interacting protein 1                                                                             | 6,79         | 1,18E-06        |
| 217975_at    | WW domain binding protein 5                                                                                   | 5,49         | 2,15E-07        |
| 229620_at    | selenoprotein P, plasma, 1                                                                                    | 5,42         | 1,00E-05        |
| 209813_x_at  | TCR gamma alternate reading frame protein; T cell receptor gamma variable 9; T cell receptor gamma constant 1 | 5,03         | 2,54E-06        |
| 227235_at    | guanylate cyclase 1, soluble, alpha 3                                                                         | 4,99         | 3,36E-05        |
| 204485_s_at  | target of myb1 (chicken)-like 1                                                                               | 4,86         | 7,51E-04        |
| 215288_at    | transient receptor potential cation channel, subfamily C, member 2 (pseudogene)                               | 4,81         | 1,64E-08        |
| 216920_s_at  | TCR gamma alternate reading frame protein; T cell receptor gamma variable 9; T cell receptor gamma constant 1 | 4,71         | 2,54E-06        |
| 215806_x_at  | TCR gamma alternate reading frame protein; T cell receptor gamma variable 9; T cell receptor gamma constant 1 | 4,66         | 2,54E-06        |
| 211144_x_at  | TCR gamma alternate reading frame protein; T cell receptor gamma variable 9; T cell receptor gamma constant 1 | 4,65         | 5,16E-06        |
| 202890_at    | microtubule-associated protein 7                                                                              | 4,56         | 1,38E-05        |
| 215016_x_at  | dystonin                                                                                                      | 4,49         | 9,85E-05        |
| 213110_s_at  | collagen, type IV, alpha 5                                                                                    | 4,48         | 1,87E-05        |
| 212775_at    | obscurin-like 1                                                                                               | 4,44         | 1,64E-08        |
| 235391_at    | family with sequence similarity 92, member A2; family with sequence similarity 92, member A1                  | 4,23         | 1,34E-07        |
| 206067_s_at  | Wilms tumor 1                                                                                                 | 4,12         | 5,84E-05        |
| 227522_at    | carboxymethylenebutenolidase homolog (Pseudomonas)                                                            | 4,10         | 1,18E-06        |
| 217963_s_at  | nerve growth factor receptor (TNFRSF16) associated protein 1                                                  | 4,09         | 9,85E-05        |
| 212254_s_at  | dystonin                                                                                                      | 4,08         | 9,15E-04        |
| 228885_at    | MAM domain containing 2                                                                                       | 4,07         | 2,05E-04        |
| 204044_at    | quinolinate phosphoribosyltransferase                                                                         | 4,05         | 5,16E-06        |
| 223599_at    | TRIM6-TRIM34 readthrough transcript; tripartite motif-containing 6; tripartite motif-containing 34            | 4,02         | 1,26E-04        |
| 1557383_a_at | ATPase inhibitory factor 1                                                                                    | 3,86         | 5,22E-07        |
| 213395_at    | megalencephalic leukoencephalopathy with subcortical cysts 1                                                  | 3,85         | 1,74E-06        |
| 228280_at    | zinc finger CCCH-type, antiviral 1-like                                                                       | 3,84         | 1,34E-07        |
| 214321_at    | nephroblastoma overexpressed gene                                                                             | 3,79         | 9,85E-05        |
| 240065_at    | family with sequence similarity 81, member B                                                                  | 3,79         | 3,23E-04        |
| 227461_at    | stonin 2                                                                                                      | 3,63         | 5,16E-06        |
| 225285_at    | branched chain aminotransferase 1, cytosolic                                                                  | 3,60         | 3,36E-05        |
| 223475_at    | cysteine-rich secretory protein LCCL domain containing 1                                                      | 3,53         | 8,23E-08        |
| 205229_s_at  | coagulation factor C homolog, cochin (Limulus polyphemus)                                                     | 3,51         | 4,45E-05        |
| 219304_s_at  | platelet derived growth factor D                                                                              | 3,51         | 1,38E-05        |
| 1553808_a_at | NK2 transcription factor related, locus 3 (Drosophila)                                                        | 3,38         | 1,87E-05        |
| 236892_s_at  | similar to hCG2042068                                                                                         | 3,38         | 7,92E-07        |
| 243010_at    | musashi homolog 2 (Drosophila)                                                                                | 3,17         | 2,05E-04        |
| 235900_at    | spinster homolog 3 (Drosophila)                                                                               | 3,16         | 2,58E-04        |
| 204069_at    | Meis homeobox 1                                                                                               | 3,16         | 1,74E-06        |
| 227860_at    | carboxypeptidase X (M14 family), member 1                                                                     | 3,15         | 7,61E-05        |
| 209160_at    | aldo-keto reductase family 1, member C3 (3-alpha hydroxysteroid dehydrogenase, type II)                       | 3,12         | 7,51E-04        |
| 235052_at    | zinc finger protein 792                                                                                       | 3,11         | 4,02E-04        |
| 209392_at    | ectonucleotide pyrophosphatase/phosphodiesterase 2                                                            | 3,11         | 4,45E-05        |
| 228708_at    | RAB27B, member RAS oncogene family                                                                            | 3,11         | 6,13E-04        |
| 225112_at    | abl interactor 2                                                                                              | 3,07         | 3,38E-07        |
| 229530_at    | guanylate cyclase 1, soluble, alpha 3                                                                         | 3,04         | 2,58E-04        |
| 203608_at    | aldehyde dehydrogenase 5 family, member A1                                                                    | 3,03         | 7,61E-05        |
| 242414_at    | quinolinate phosphoribosyltransferase                                                                         | 3,02         | 1,61E-04        |
| 239237_at    | amphiphysin                                                                                                   | 3,00         | 2,05E-04        |
| 241903_at    | potassium channel tetramerisation domain containing 3                                                         | 2,97         | 1,87E-05        |
| 226517_at    | branched chain aminotransferase 1, cytosolic                                                                  | 2,95         | 6,13E-04        |
| 221606_s_at  | nucleosomal binding protein 1                                                                                 | 2,94         | 1,87E-05        |
| 221942_s_at  | guanylate cyclase 1, soluble, alpha 3                                                                         | 2,94         | 3,23E-04        |
| 209662_at    | centrin, EF-hand protein, 3 (CDC31 homolog, yeast)                                                            | 2,91         | 7,23E-06        |
| 226190_at    | mitogen-activated protein kinase kinase kinase 13                                                             | 2,90         | 4,02E-04        |
| 230666_at    | HOXA11 antisense RNA (non-protein coding)                                                                     | 2,88         | 7,61E-05        |
| 232424_at    | PR domain containing 16                                                                                       | 2,87         | 7,51E-04        |
| 232979_at    |                                                                                                               | 2,87         | 5,84E-05        |
| 215599_at    | glucuronidase, beta pseudogene                                                                                | 2,86         | 4,97E-04        |
| 220377_at    | family with sequence similarity 30, member A                                                                  | 2,82         | 2,05E-04        |
| 213258_at    | tissue factor pathway inhibitor (lipoprotein-associated coagulation inhibitor)                                | 2,81         | 3,23E-04        |
| 203762_s_at  | dynein, cytoplasmic 2, light intermediate chain 1                                                             | 2,77         | 1,87E-05        |
| 226556_at    | ribosomal protein L4; ribosomal protein L4 pseudogene 5; ribosomal protein L4 pseudogene 4                    | 2,76         | 3,23E-04        |
| 227509_x_at  |                                                                                                               | 2,73         | 1,38E-05        |
| 226134_s_at  | musashi homolog 2 (Drosophila)                                                                                | 2,73         | 1,61E-04        |
| 236918_s_at  | leucine rich repeat containing 34                                                                             | 2,70         | 3,36E-05        |
| 243128_at    | zinc finger protein 175                                                                                       | 2,69         | 1,00E-05        |
| 203151_at    | microtubule-associated protein 1A                                                                             | 2,69         | 8,23E-08        |
| 225098_at    | abl interactor 2                                                                                              | 2,66         | 2,52E-05        |
| 230174_at    | lysophospholipase-like 1                                                                                      | 2,65         | 4,02E-04        |
| 222603_at    | endoplasmic reticulum metalloproteinase 1                                                                     | 2,65         | 4,02E-04        |
| 238122_at    | RNA binding motif protein 12B                                                                                 | 2,64         | 7,23E-06        |
| 228245_s_at  | similar to hCG38149                                                                                           | 2,64         | 1,18E-06        |
| 239791_at    | similar to hCG2042068                                                                                         | 2,63         | 7,61E-05        |
| 1561737_at   |                                                                                                               | 2,59         | 2,52E-05        |
| 230743_at    | hypothetical LOC404266                                                                                        | 2,58         | 5,16E-06        |
| 225240_s_at  | musashi homolog 2 (Drosophila)                                                                                | 2,56         | 2,58E-04        |
| 243996_at    | natriuretic peptide receptor B/guanylate cyclase B (atrionatriuretic peptide receptor B)                      | 2,53         | 5,16E-06        |
| 224880_at    | v-ral simian leukemia viral oncogene homolog A (ras related)                                                  | 2,52         | 7,61E-05        |
| 204798_at    | v-myb myeloblastosis viral oncogene homolog (avian)                                                           | 2,51         | 9,85E-05        |
| 1568964_x_at | sialoporphin                                                                                                  | 2,50         | 9,85E-05        |
| 219372_at    | intraflagellar transport 81 homolog (Chlamydomonas)                                                           | 2,49         | 5,84E-05        |
| 205677_s_at  | deleted in lymphocytic leukemia 1 (non-protein coding)                                                        | 2,47         | 3,38E-07        |
| 218792_s_at  | B-box and SPRY domain containing                                                                              | 2,47         | 1,61E-04        |

|              |                                                                                                           |      |          |
|--------------|-----------------------------------------------------------------------------------------------------------|------|----------|
| 239963_at    |                                                                                                           | 2,47 | 1,38E-05 |
| 217892_s_at  | LIM domain and actin binding 1                                                                            | 2,46 | 5,16E-06 |
| 201397_at    | phosphoglycerate dehydrogenase                                                                            | 2,45 | 8,23E-08 |
| 231852_at    | exoribonuclease 1                                                                                         | 2,45 | 3,23E-04 |
| 231319_x_at  | kinesin family member 9                                                                                   | 2,45 | 4,45E-05 |
| 212981_s_at  | family with sequence similarity 115, member A; family with sequence similarity 115, member B (pseudogene) | 2,43 | 4,97E-04 |
| 226043_at    | G-protein signaling modulator 1 (AGS3-like, <i>C. elegans</i> )                                           | 2,42 | 7,61E-05 |
| 201664_at    | structural maintenance of chromosomes 4                                                                   | 2,42 | 1,26E-04 |
| 227329_at    | zinc finger and BTB domain containing 46                                                                  | 2,42 | 5,84E-05 |
| 1566482_at   |                                                                                                           | 2,42 | 6,13E-04 |
| 243579_at    | musashi homolog 2 ( <i>Drosophila</i> )                                                                   | 2,40 | 9,15E-04 |
| 228904_at    | homeobox B3                                                                                               | 2,40 | 4,45E-05 |
| 209537_at    | exostosins (multiple)-like 2                                                                              | 2,40 | 5,84E-05 |
| 208798_x_at  | golgi autoantigen, golgin subfamily a, 8B; golgi autoantigen, golgin subfamily a, 8A                      | 2,38 | 6,13E-04 |
| 32723_at     | cleavage stimulation factor, 3' pre-RNA, subunit 1, 50kDa                                                 | 2,38 | 7,92E-07 |
| 206148_at    | interleukin 3 receptor, alpha (low affinity)                                                              | 2,37 | 9,15E-04 |
| 225439_at    | NudC domain containing 1                                                                                  | 2,36 | 5,22E-07 |
| 200050_at    | zinc finger protein 146                                                                                   | 2,36 | 3,64E-06 |
| 213891_s_at  | transcription factor 4                                                                                    | 2,36 | 2,58E-04 |
| 236921_at    | embigin homolog (mouse)                                                                                   | 2,36 | 5,84E-05 |
| 223000_s_at  | F11 receptor                                                                                              | 2,35 | 1,64E-08 |
| 203362_s_at  | MAD2 mitotic arrest deficient-like 1 (yeast)                                                              | 2,34 | 2,52E-05 |
| 226339_at    | TruB pseudouridine (psi) synthase homolog 1 ( <i>E. coli</i> )                                            | 2,34 | 3,64E-06 |
| 225256_at    |                                                                                                           | 2,34 | 4,97E-04 |
| 220668_s_at  | DNA (cytosine-5)-methyltransferase 3 beta                                                                 | 2,33 | 9,85E-05 |
| 244663_at    |                                                                                                           | 2,33 | 9,85E-05 |
| 215111_s_at  | TSC22 domain family, member 1                                                                             | 2,32 | 7,51E-04 |
| 1554489_a_at | centrosomal protein 70kDa                                                                                 | 2,30 | 4,97E-04 |
| 230670_at    | immunoglobulin superfamily, member 10                                                                     | 2,30 | 9,15E-04 |
| 220798_x_at  | plasticity-related gene 2                                                                                 | 2,30 | 1,26E-04 |
| 226157_at    | transcription factor Dp-2 (E2F dimerization partner 2)                                                    | 2,30 | 2,58E-04 |
| 219703_at    | meiosis-specific nuclear structural 1                                                                     | 2,29 | 7,61E-05 |
| 224959_at    | solute carrier family 26 (sulfate transporter), member 2                                                  | 2,29 | 2,58E-04 |
| 201294_s_at  | WD repeat and SOCS box-containing 1                                                                       | 2,29 | 1,26E-04 |
| 225734_at    | FBXO22 opposite strand (non-protein coding); F-box protein 22                                             | 2,29 | 3,36E-05 |
| 237388_at    | glomulin, FKBP associated protein                                                                         | 2,29 | 4,45E-05 |
| 243707_at    |                                                                                                           | 2,28 | 7,61E-05 |
| 1569503_at   | HEAT repeat containing 5B                                                                                 | 2,28 | 3,23E-04 |
| 208407_s_at  | catenin (cadherin-associated protein), delta 1                                                            | 2,26 | 3,23E-04 |
| 206478_at    | KIAA0125                                                                                                  | 2,26 | 4,02E-04 |
| 202946_s_at  | BTB (POZ) domain containing 3                                                                             | 2,26 | 6,13E-04 |
| 229431_at    | regulatory factor X-associated protein                                                                    | 2,25 | 1,87E-05 |
| 218643_s_at  | cysteine-rich PDZ-binding protein                                                                         | 2,25 | 5,84E-05 |
| 201242_s_at  | ATPase, Na <sup>+</sup> /K <sup>+</sup> transporting, beta 1 polypeptide                                  | 2,24 | 7,51E-04 |
| 235779_at    | hypothetical protein LOC284408                                                                            | 2,24 | 3,36E-05 |
| 1558700_s_at | zinc finger protein 260                                                                                   | 2,24 | 9,85E-05 |
| 231897_at    | prostaglandin reductase 1                                                                                 | 2,24 | 9,15E-04 |
| 212463_at    | CD59 molecule, complement regulatory protein                                                              | 2,23 | 4,97E-04 |
| 210999_s_at  | growth factor receptor-bound protein 10                                                                   | 2,23 | 9,15E-04 |
| 225671_at    | spinster homolog 2 ( <i>Drosophila</i> )                                                                  | 2,23 | 1,26E-04 |
| 230298_at    | metallo-beta-lactamase domain containing 2                                                                | 2,22 | 9,85E-05 |
| 236953_s_at  | NHL repeat containing 3                                                                                   | 2,22 | 3,64E-06 |
| 1554973_a_at | zinc finger and BTB domain containing 26                                                                  | 2,22 | 9,15E-04 |
| 213541_s_at  | v-ets erythroblastosis virus E26 oncogene homolog (avian)                                                 | 2,22 | 9,15E-04 |
| 228974_at    | zinc finger protein 677                                                                                   | 2,21 | 1,61E-04 |
| 226120_at    | tetratricopeptide repeat domain 8                                                                         | 2,21 | 7,92E-07 |
| 201111_at    | CSE1 chromosome segregation 1-like (yeast)                                                                | 2,21 | 9,15E-04 |
| 205063_at    | survival of motor neuron protein interacting protein 1                                                    | 2,21 | 7,92E-07 |
| 230281_at    | chromosome 16 open reading frame 46                                                                       | 2,21 | 7,92E-07 |
| 212855_at    | DCN1, defective in cullin neddylation 1, domain containing 4 ( <i>S. cerevisiae</i> )                     | 2,21 | 7,61E-05 |
| 230032_at    | O-sialoglycoprotein endopeptidase-like 1                                                                  | 2,20 | 1,87E-05 |
| 242691_at    |                                                                                                           | 2,20 | 3,23E-04 |
| 225752_at    | non imprinted in Prader-Willi/Angelman syndrome 1                                                         | 2,20 | 1,26E-04 |
| 213056_at    | FERM domain containing 4B                                                                                 | 2,19 | 4,97E-04 |
| 225974_at    | transmembrane protein 64                                                                                  | 2,19 | 1,87E-05 |
| 1559477_s_at | Meis homeobox 1                                                                                           | 2,19 | 6,13E-04 |
| 1554769_at   | zinc finger protein 688; zinc finger protein 785                                                          | 2,18 | 2,05E-04 |
| 241815_at    |                                                                                                           | 2,18 | 6,13E-04 |
| 211423_s_at  | sterol-C5-desaturase (ERG3 delta-5-desaturase homolog, <i>S. cerevisiae</i> )-like                        | 2,18 | 1,38E-05 |
| 219174_at    | intraflagellar transport 74 homolog ( <i>Chlamydomonas</i> )                                              | 2,18 | 6,13E-04 |
| 212905_at    | cleavage stimulation factor, 3' pre-RNA, subunit 2, 64kDa, tau variant                                    | 2,17 | 9,85E-05 |
| 234423_x_at  |                                                                                                           | 2,17 | 5,16E-06 |
| 224968_at    | coiled-coil domain containing 104                                                                         | 2,17 | 2,54E-06 |
| 41329_at     | SCY1-like 3 ( <i>S. cerevisiae</i> )                                                                      | 2,17 | 1,61E-04 |
| 243462_s_at  | BTB (POZ) domain containing 3                                                                             | 2,16 | 1,61E-04 |
| 226800_at    | EF-hand calcium binding domain 7                                                                          | 2,16 | 3,23E-04 |
| 208002_s_at  | acyl-CoA thioesterase 7                                                                                   | 2,16 | 7,61E-05 |
| 209695_at    | protein tyrosine phosphatase type IVA, member 3                                                           | 2,16 | 1,38E-05 |
| 231995_at    | chromosome 9 open reading frame 82                                                                        | 2,15 | 1,34E-07 |
| 229589_x_at  | basic, immunoglobulin-like variable motif containing                                                      | 2,15 | 7,51E-04 |
| 204142_at    | enolase superfamily member 1                                                                              | 2,14 | 2,05E-04 |
| 204045_at    | transcription elongation factor A (SII)-like 1                                                            | 2,14 | 9,85E-05 |
| 224581_s_at  | nuclear casein kinase and cyclin-dependent kinase substrate 1                                             | 2,14 | 1,00E-05 |
| 235346_at    | FUN14 domain containing 1                                                                                 | 2,14 | 3,38E-07 |
| 212604_at    | mitochondrial ribosomal protein S31                                                                       | 2,13 | 3,36E-05 |
| 238712_at    |                                                                                                           | 2,13 | 1,61E-04 |
| 224819_at    | transcription elongation factor A (SII)-like 8                                                            | 2,13 | 6,13E-04 |
| 219169_s_at  | transcription factor B1, mitochondrial                                                                    | 2,13 | 1,00E-05 |
| 212386_at    | transcription factor 4                                                                                    | 2,12 | 3,23E-04 |
| 219583_s_at  | spermatogenesis associated 7                                                                              | 2,12 | 1,38E-05 |
| 239091_at    | coiled-coil domain containing 52                                                                          | 2,12 | 1,26E-04 |

|             |                                                                                                                                                                         |      |          |
|-------------|-------------------------------------------------------------------------------------------------------------------------------------------------------------------------|------|----------|
| 213645_at   | enolase superfamily member 1                                                                                                                                            | 2,12 | 1,38E-05 |
| 218847_at   | insulin-like growth factor 2 mRNA binding protein 2                                                                                                                     | 2,12 | 7,61E-05 |
| 225086_at   | family with sequence similarity 98, member B                                                                                                                            | 2,12 | 2,05E-04 |
| 222266_at   | chromosome 19 open reading frame 2                                                                                                                                      | 2,12 | 1,26E-04 |
| 228597_at   | chromosome 21 open reading frame 45                                                                                                                                     | 2,12 | 1,74E-06 |
| 209146_at   | sterol-C4-methyl oxidase-like                                                                                                                                           | 2,12 | 9,85E-05 |
| 231817_at   | ubiquitin specific peptidase 53                                                                                                                                         | 2,11 | 4,02E-04 |
| 236917_at   | leucine rich repeat containing 34                                                                                                                                       | 2,11 | 4,45E-05 |
| 227569_at   | ligand of numb-protein X 2                                                                                                                                              | 2,11 | 9,15E-04 |
| 218889_at   | nucleolar complex associated 3 homolog (S. cerevisiae)                                                                                                                  | 2,11 | 3,23E-04 |
| 221652_s_at | chromosome 12 open reading frame 11                                                                                                                                     | 2,10 | 4,02E-04 |
| 225028_at   | hypothetical LOC550643                                                                                                                                                  | 2,10 | 9,15E-04 |
| 227301_at   | chaperonin containing TCP1, subunit 6 (zeta) pseudogene 1                                                                                                               | 2,10 | 3,38E-07 |
| 1569540_at  | nemo-like kinase                                                                                                                                                        | 2,10 | 1,61E-04 |
| 202371_at   | transcription elongation factor A (SII)-like 4                                                                                                                          | 2,10 | 4,45E-05 |
| 208963_x_at | fatty acid desaturase 1                                                                                                                                                 | 2,09 | 7,51E-04 |
| 218718_at   | platelet derived growth factor C                                                                                                                                        | 2,09 | 3,23E-04 |
| 209143_s_at | chloride channel, nucleotide-sensitive, 1A                                                                                                                              | 2,08 | 1,00E-05 |
| 232338_at   | zinc finger protein 431                                                                                                                                                 | 2,08 | 1,74E-06 |
| 209905_at   | homeobox A9                                                                                                                                                             | 2,08 | 4,02E-04 |
| 225537_at   | trafficking protein particle complex 6B                                                                                                                                 | 2,08 | 3,36E-05 |
| 231970_at   | chromosome 14 open reading frame 118                                                                                                                                    | 2,08 | 4,45E-05 |
| 225554_s_at | anaphase promoting complex subunit 7                                                                                                                                    | 2,08 | 3,36E-05 |
| 226583_at   | chromosome 12 open reading frame 76                                                                                                                                     | 2,08 | 4,93E-08 |
| 202252_at   | RAB13, member RAS oncogene family; similar to hCG24991                                                                                                                  | 2,07 | 2,58E-04 |
| 217988_at   | cyclin B1 interacting protein 1                                                                                                                                         | 2,07 | 4,02E-04 |
| 203763_at   | dynein, cytoplasmic 2, light intermediate chain 1                                                                                                                       | 2,07 | 2,54E-06 |
| 225835_at   | solute carrier family 12 (sodium/potassium/chloride transporters), member 2                                                                                             | 2,07 | 2,54E-06 |
| 218480_at   | ATP/GTP binding protein-like 5                                                                                                                                          | 2,06 | 2,58E-04 |
| 219007_at   | nucleoporin 43kDa                                                                                                                                                       | 2,06 | 3,36E-05 |
| 231857_s_at | ATP/GTP binding protein-like 5                                                                                                                                          | 2,06 | 4,97E-04 |
| 229700_at   | zinc finger protein 738                                                                                                                                                 | 2,06 | 3,23E-04 |
| 222754_at   | tRNA nucleotidyl transferase, CCA-adding, 1                                                                                                                             | 2,06 | 4,02E-04 |
| 229533_x_at | zinc finger protein 680                                                                                                                                                 | 2,06 | 7,61E-05 |
| 227798_at   | SMAD family member 1                                                                                                                                                    | 2,06 | 7,51E-04 |
| 209272_at   | NGFI-A binding protein 1 (EGR1 binding protein 1)                                                                                                                       | 2,06 | 3,36E-05 |
| 235132_at   | hypothetical protein LOC254128                                                                                                                                          | 2,06 | 5,84E-05 |
| 211064_at   | zinc finger protein 493                                                                                                                                                 | 2,06 | 3,36E-05 |
| 229090_at   | hypothetical LOC220930                                                                                                                                                  | 2,05 | 9,85E-05 |
| 1560133_at  | GRB10 interacting GYF protein 2                                                                                                                                         | 2,05 | 2,52E-05 |
| 222604_at   | general transcription factor IIIc, polypeptide 3, 102kDa                                                                                                                | 2,04 | 7,92E-07 |
| 225581_s_at | mitochondrial ribosomal protein L50                                                                                                                                     | 2,04 | 1,61E-04 |
| 201263_at   | threonyl-tRNA synthetase                                                                                                                                                | 2,04 | 7,23E-06 |
| 202862_at   | fumarylacetoacetate hydrolase (fumarylacetoacetase)                                                                                                                     | 2,04 | 3,23E-04 |
| 211464_x_at | caspase 6, apoptosis-related cysteine peptidase                                                                                                                         | 2,04 | 4,02E-04 |
| 236924_at   | glomulin, FKBP associated protein                                                                                                                                       | 2,04 | 2,54E-06 |
| 222762_x_at | LIM domains containing 1                                                                                                                                                | 2,03 | 2,52E-05 |
| 210145_at   | phospholipase A2, group IVA (cytosolic, calcium-dependent)                                                                                                              | 2,03 | 6,13E-04 |
| 213089_at   | ENSG00000219982                                                                                                                                                         | 2,03 | 6,13E-04 |
| 210705_s_at | tripartite motif-containing 5                                                                                                                                           | 2,02 | 6,13E-04 |
| 218395_at   | ARP6 actin-related protein 6 homolog (yeast)                                                                                                                            | 2,02 | 2,15E-07 |
| 204162_at   | NDC80 homolog, kinetochore complex component (S. cerevisiae)                                                                                                            | 2,02 | 7,51E-04 |
| 202020_s_at | LanC lantibiotic synthetase component C-like 1 (bacterial)                                                                                                              | 2,02 | 1,87E-05 |
| 201930_at   | minichromosome maintenance complex component 6                                                                                                                          | 2,02 | 5,16E-06 |
| 236704_at   | hypothetical protein LOC100134230; similar to KIAA0454 protein; similar to phosphodiesterase 4D interacting protein isoform 2; phosphodiesterase 4D interacting protein | 2,02 | 5,16E-06 |
| 227792_at   | inositol 1,4,5-triphosphate receptor interacting protein-like 2                                                                                                         | 2,02 | 7,51E-04 |
| 201892_s_at | IMP (inosine monophosphate) dehydrogenase 2                                                                                                                             | 2,01 | 6,13E-04 |
| 225421_at   | peptidase M20 domain containing 2                                                                                                                                       | 2,00 | 4,02E-04 |

## B

| Probe set    | Gene name                                                                                                                                                  | Ratio | P value  |
|--------------|------------------------------------------------------------------------------------------------------------------------------------------------------------|-------|----------|
| 213006_at    | CCAAT/enhancer binding protein (C/EBP), delta                                                                                                              | 10,22 | 2,52E-05 |
| 211571_s_at  | versican                                                                                                                                                   | 8,26  | 1,26E-04 |
| 203922_s_at  | cytochrome b-245, beta polypeptide                                                                                                                         | 8,23  | 7,23E-06 |
| 209728_at    | major histocompatibility complex, class II, DR beta 4; major histocompatibility complex, class II, DR beta 1                                               | 7,98  | 5,84E-05 |
| 222496_s_at  | RNA binding motif protein 47                                                                                                                               | 7,61  | 5,84E-05 |
| 215646_s_at  | versican                                                                                                                                                   | 7,10  | 1,26E-04 |
| 228325_at    | KIAA0146                                                                                                                                                   | 6,86  | 1,61E-04 |
| 201670_s_at  | myristoylated alanine-rich protein kinase C substrate                                                                                                      | 6,79  | 2,58E-04 |
| 1554406_a_at | C-type lectin domain family 7, member A                                                                                                                    | 6,63  | 7,61E-05 |
| 219593_at    | solute carrier family 15, member 3                                                                                                                         | 6,63  | 2,05E-04 |
| 220088_at    | complement component 5a receptor 1                                                                                                                         | 6,61  | 3,23E-04 |
| 203923_s_at  | cytochrome b-245, beta polypeptide                                                                                                                         | 6,28  | 2,05E-04 |
| 223454_at    | chemokine (C-X-C motif) ligand 16                                                                                                                          | 6,22  | 5,84E-05 |
| 212657_s_at  | interleukin 1 receptor antagonist                                                                                                                          | 6,15  | 9,85E-05 |
| 212671_s_at  | similar to HLA class II histocompatibility antigen, DQ(1) alpha chain precursor (DC-4 alpha chain); major histocompatibility complex, class II, DQ alpha 1 | 6,03  | 4,45E-05 |
| 213524_s_at  | G0/G1switch 2                                                                                                                                              | 6,00  | 2,58E-04 |
| 205237_at    | ficolin (collagen/fibrinogen domain containing) 1                                                                                                          | 5,98  | 9,85E-05 |
| 218831_s_at  | Fc fragment of IgG, receptor, transporter, alpha                                                                                                           | 5,97  | 5,16E-06 |
| 1555756_a_at | C-type lectin domain family 7, member A                                                                                                                    | 5,95  | 9,85E-05 |
| 220266_s_at  | Kruppel-like factor 4 (gut)                                                                                                                                | 5,88  | 3,36E-05 |
| 205789_at    | CD1d molecule                                                                                                                                              | 5,87  | 2,52E-05 |
| 202878_s_at  | CD93 molecule                                                                                                                                              | 5,66  | 9,85E-05 |
| 226818_at    | macrophage expressed 1                                                                                                                                     | 5,61  | 4,45E-05 |
| 201743_at    | CD14 molecule                                                                                                                                              | 5,57  | 4,97E-04 |
| 205098_at    | chemokine (C-C motif) receptor 1                                                                                                                           | 5,53  | 2,05E-04 |
| 203066_at    | carbohydrate (N-acetylgalactosamine 4-sulfate 6-O) sulfotransferase 15                                                                                     | 5,53  | 4,97E-04 |

|              |                                                                                                                         |      |          |
|--------------|-------------------------------------------------------------------------------------------------------------------------|------|----------|
| 221541_at    | cysteine-rich secretory protein LCCL domain containing 2                                                                | 5,41 | 4,97E-04 |
| 201739_at    | serum/glucocorticoid regulated kinase 1                                                                                 | 5,41 | 5,22E-07 |
| 218559_s_at  | v-maf musculoaponeurotic fibrosarcoma oncogene homolog B (avian)                                                        | 5,40 | 2,58E-04 |
| 221698_s_at  | C-type lectin domain family 7, member A                                                                                 | 5,37 | 9,85E-05 |
| 225897_at    | myristoylated alanine-rich protein kinase C substrate                                                                   | 5,27 | 9,15E-04 |
| 222670_s_at  | v-maf musculoaponeurotic fibrosarcoma oncogene homolog B (avian)                                                        | 5,27 | 2,58E-04 |
| 204588_s_at  | solute carrier family 7 (cationic amino acid transporter, y+ system), member 7                                          | 5,25 | 1,61E-04 |
| 207697_x_at  | leukocyte immunoglobulin-like receptor, subfamily B (with TM and ITIM domains), member 2                                | 5,22 | 6,13E-04 |
| 238032_at    | dehydrogenase/reductase (SDR family) member 3                                                                           | 5,04 | 5,22E-07 |
| 211101_x_at  | leukocyte immunoglobulin-like receptor, subfamily A (with TM domain), member 2                                          | 5,03 | 1,38E-05 |
| 217552_x_at  | complement component (3b/4b) receptor 1 (Knops blood group)                                                             | 4,97 | 1,26E-04 |
| 219505_at    | cat eye syndrome chromosome region, candidate 1                                                                         | 4,96 | 2,52E-05 |
| 206631_at    | prostaglandin E receptor 2 (subtype EP2), 53kDa                                                                         | 4,96 | 2,54E-06 |
| 214084_x_at  | neutrophil cytosolic factor 1; neutrophil cytosolic factor 1C pseudogene                                                | 4,92 | 9,15E-04 |
| 203973_s_at  | CCAAT/enhancer binding protein (C/EBP), delta                                                                           | 4,92 | 3,23E-04 |
| 221210_s_at  | N-acetylneuraminate pyruvate lyase (dihydrodipicolinate synthase)                                                       | 4,84 | 2,52E-05 |
| 205863_at    | S100 calcium binding protein A12                                                                                        | 4,84 | 7,51E-04 |
| 218035_s_at  | RNA binding motif protein 47                                                                                            | 4,82 | 7,61E-05 |
| 202833_s_at  | serpin peptidase inhibitor, clade A (alpha-1 antiproteinase, antitrypsin), member 1                                     | 4,81 | 1,61E-04 |
| 212188_at    | potassium channel tetramerisation domain containing 12                                                                  | 4,76 | 1,61E-04 |
| 204735_at    | phosphodiesterase 4A, cAMP-specific (phosphodiesterase E2 dunce homolog, Drosophila)                                    | 4,73 | 5,22E-07 |
| 201669_s_at  | myristoylated alanine-rich protein kinase C substrate                                                                   | 4,72 | 2,05E-04 |
| 231078_at    | solute carrier family 25, member 37                                                                                     | 4,71 | 1,87E-05 |
| 206584_at    | lymphocyte antigen 96                                                                                                   | 4,70 | 1,26E-04 |
| 205067_at    | interleukin 1, beta                                                                                                     | 4,69 | 1,26E-04 |
| 211962_s_at  | zinc finger protein 36, C3H type-like 1                                                                                 | 4,67 | 8,23E-08 |
| 211965_at    | zinc finger protein 36, C3H type-like 1                                                                                 | 4,57 | 3,38E-07 |
| 202637_s_at  | intercellular adhesion molecule 1                                                                                       | 4,54 | 1,87E-05 |
| 229937_x_at  | leukocyte immunoglobulin-like receptor, subfamily B (with TM and ITIM domains), member 1                                | 4,54 | 3,23E-04 |
| 1554624_a_at | signal-regulatory protein beta 1                                                                                        | 4,53 | 1,61E-04 |
| 1556750_at   | hypothetical protein LOC153577                                                                                          | 4,47 | 3,23E-04 |
| 208092_s_at  | family with sequence similarity 49, member A                                                                            | 4,45 | 1,74E-06 |
| 233555_s_at  | sulfatase 2                                                                                                             | 4,45 | 3,36E-05 |
| 204912_at    | interleukin 10 receptor, alpha                                                                                          | 4,34 | 3,36E-05 |
| 202838_at    | fucosidase, alpha-L- 1, tissue                                                                                          | 4,25 | 2,05E-04 |
| 200866_s_at  | prosaposin                                                                                                              | 4,22 | 1,26E-04 |
| 209823_x_at  | major histocompatibility complex, class II, DQ beta 1; similar to major histocompatibility complex, class II, DQ beta 1 | 4,21 | 4,02E-04 |
| 202902_s_at  | cathepsin S                                                                                                             | 4,14 | 7,61E-05 |
| 226841_at    | macrophage expressed 1                                                                                                  | 4,11 | 6,13E-04 |
| 209304_x_at  | growth arrest and DNA-damage-inducible, beta                                                                            | 4,10 | 1,38E-05 |
| 221841_s_at  | Kruppel-like factor 4 (gut)                                                                                             | 4,08 | 1,87E-05 |
| 205992_s_at  | interleukin 15                                                                                                          | 4,07 | 1,74E-06 |
| 209305_s_at  | growth arrest and DNA-damage-inducible, beta                                                                            | 4,07 | 2,58E-04 |
| 204103_at    | chemokine (C-C motif) ligand 4                                                                                          | 4,03 | 4,02E-04 |
| 201422_at    | interferon, gamma-inducible protein 30                                                                                  | 4,01 | 1,26E-04 |
| 210895_s_at  | CD86 molecule                                                                                                           | 4,00 | 2,58E-04 |
| 202638_s_at  | intercellular adhesion molecule 1                                                                                       | 4,00 | 2,58E-04 |
| 201566_x_at  | inhibitor of DNA binding 2, dominant negative helix-loop-helix protein                                                  | 3,99 | 1,34E-07 |
| 210904_s_at  | interleukin 13 receptor, alpha 1                                                                                        | 3,95 | 9,85E-05 |
| 229383_at    | membrane-associated ring finger (C3HC4) 1                                                                               | 3,92 | 1,61E-04 |
| 209949_at    | neutrophil cytosolic factor 2                                                                                           | 3,92 | 9,15E-04 |
| 204620_s_at  | versican                                                                                                                | 3,89 | 4,02E-04 |
| 208949_s_at  | lectin, galactoside-binding, soluble, 3                                                                                 | 3,88 | 9,85E-05 |
| 219947_at    | C-type lectin domain family 4, member A                                                                                 | 3,88 | 9,85E-05 |
| 212192_at    | potassium channel tetramerisation domain containing 12                                                                  | 3,86 | 4,02E-04 |
| 203761_at    | Src-like-adapter                                                                                                        | 3,85 | 4,97E-04 |
| 202295_s_at  | cathepsin H                                                                                                             | 3,85 | 4,02E-04 |
| 205027_s_at  | mitogen-activated protein kinase kinase kinase 8                                                                        | 3,85 | 5,16E-06 |
| 209286_at    | CDC42 effector protein (Rho GTPase binding) 3                                                                           | 3,84 | 5,22E-07 |
| 205859_at    | lymphocyte antigen 86                                                                                                   | 3,83 | 3,36E-05 |
| 224790_at    | ArfGAP with SH3 domain, ankyrin repeat and PH domain 1                                                                  | 3,82 | 1,87E-05 |
| 218217_at    | serine carboxypeptidase 1                                                                                               | 3,81 | 6,13E-04 |
| 211100_x_at  | leukocyte immunoglobulin-like receptor, subfamily A (with TM domain), member 2                                          | 3,78 | 2,52E-05 |
| 213537_at    | major histocompatibility complex, class II, DP alpha 1                                                                  | 3,77 | 1,61E-04 |
| 206488_s_at  | CD36 molecule (thrombospondin receptor)                                                                                 | 3,75 | 9,85E-05 |
| 235593_at    | zinc finger E-box binding homeobox 2                                                                                    | 3,73 | 1,87E-05 |
| 38037_at     | heparin-binding EGF-like growth factor                                                                                  | 3,71 | 2,58E-04 |
| 205099_s_at  | chemokine (C-C motif) receptor 1                                                                                        | 3,71 | 2,58E-04 |
| 209555_s_at  | CD36 molecule (thrombospondin receptor)                                                                                 | 3,70 | 2,05E-04 |
| 224724_at    | sulfatase 2                                                                                                             | 3,70 | 5,84E-05 |
| 221731_x_at  | versican                                                                                                                | 3,68 | 6,13E-04 |
| 225800_at    | JAZF zinc finger 1                                                                                                      | 3,67 | 7,23E-06 |
| 217371_s_at  | interleukin 15                                                                                                          | 3,67 | 7,92E-07 |
| 227645_at    | phosphoinositide-3-kinase, regulatory subunit 5                                                                         | 3,67 | 7,23E-06 |
| 214366_s_at  | arachidonate 5-lipoxygenase                                                                                             | 3,66 | 4,97E-04 |
| 207857_at    | leukocyte immunoglobulin-like receptor, subfamily A (with TM domain), member 2                                          | 3,64 | 3,23E-04 |
| 211656_x_at  | major histocompatibility complex, class II, DQ beta 1; similar to major histocompatibility complex, class II, DQ beta 1 | 3,63 | 1,26E-04 |
| 214590_s_at  | ubiquitin-conjugating enzyme E2D 1 (UBC4/5 homolog, yeast)                                                              | 3,63 | 7,51E-04 |
| 208450_at    | lectin, galactoside-binding, soluble, 2                                                                                 | 3,63 | 2,58E-04 |
| 202988_s_at  | regulator of G-protein signaling 1                                                                                      | 3,61 | 1,61E-04 |
| 228918_at    | solute carrier family 43, member 2                                                                                      | 3,61 | 6,13E-04 |
| 211135_x_at  | leukocyte immunoglobulin-like receptor, subfamily B (with TM and ITIM domains), member 3                                | 3,61 | 6,13E-04 |
| 1564077_at   | GPRIN family member 3                                                                                                   | 3,61 | 3,23E-04 |

|              |                                                                                                              |      |          |
|--------------|--------------------------------------------------------------------------------------------------------------|------|----------|
| 203645_s_at  | CD163 molecule                                                                                               | 3,60 | 9,15E-04 |
| 202388_at    | regulator of G-protein signaling 2, 24kDa                                                                    | 3,57 | 1,74E-06 |
| 209287_s_at  | CDC42 effector protein (Rho GTPase binding) 3                                                                | 3,55 | 1,74E-06 |
| 217388_s_at  | kynureninase (L-kynurenine hydrolase)                                                                        | 3,55 | 9,85E-05 |
| 200838_at    | cathepsin B                                                                                                  | 3,54 | 7,51E-04 |
| 223343_at    | membrane-spanning 4-domains, subfamily A, member 7                                                           | 3,52 | 7,51E-04 |
| 209683_at    | family with sequence similarity 49, member A                                                                 | 3,52 | 4,97E-04 |
| 207574_s_at  | growth arrest and DNA-damage-inducible, beta                                                                 | 3,51 | 4,45E-05 |
| 204440_at    | CD83 molecule                                                                                                | 3,50 | 3,64E-06 |
| 200785_s_at  | low density lipoprotein-related protein 1 (alpha-2-macroglobulin receptor)                                   | 3,49 | 4,45E-05 |
| 205419_at    | G protein-coupled receptor 183                                                                               | 3,48 | 5,84E-05 |
| 209288_s_at  | CDC42 effector protein (Rho GTPase binding) 3                                                                | 3,47 | 1,18E-06 |
| 211429_s_at  | serpin peptidase inhibitor, clade A (alpha-1 antiproteinase, antitrypsin), member 1                          | 3,47 | 2,58E-04 |
| 235670_at    | syntaxin 11                                                                                                  | 3,46 | 7,23E-06 |
| 210146_x_at  | leukocyte immunoglobulin-like receptor, subfamily B (with TM and ITIM domains), member 2                     | 3,46 | 9,15E-04 |
| 205639_at    | acyloxyacyl hydrolase (neutrophil)                                                                           | 3,46 | 1,87E-05 |
| 225685_at    | CDC42 effector protein (Rho GTPase binding) 3                                                                | 3,42 | 3,64E-06 |
| 211612_s_at  | interleukin 13 receptor, alpha 1                                                                             | 3,42 | 9,85E-05 |
| 210423_s_at  | solute carrier family 11 (proton-coupled divalent metal ion transporters), member 1                          | 3,41 | 9,15E-04 |
| 203773_x_at  | biliverdin reductase A                                                                                       | 3,37 | 4,02E-04 |
| 242230_at    | ataxin 1                                                                                                     | 3,36 | 1,61E-04 |
| 1555745_a_at | lysozyme (renal amyloidosis)                                                                                 | 3,34 | 1,61E-04 |
| 204057_at    | interferon regulatory factor 8                                                                               | 3,33 | 3,36E-05 |
| 218486_at    | Kruppel-like factor 11                                                                                       | 3,32 | 2,58E-04 |
| 1554899_s_at | Fc fragment of IgE, high affinity I, receptor for: gamma polypeptide                                         | 3,31 | 9,15E-04 |
| 222218_s_at  | paired immunoglobulin-like type 2 receptor alpha                                                             | 3,30 | 4,97E-04 |
| 230276_at    | family with sequence similarity 49, member A                                                                 | 3,29 | 2,58E-04 |
| 209696_at    | fructose-1,6-bisphosphatase 1                                                                                | 3,28 | 9,15E-04 |
| 203907_s_at  | IQ motif and Sec7 domain 1                                                                                   | 3,24 | 3,36E-05 |
| 203932_at    | major histocompatibility complex, class II, DM beta                                                          | 3,24 | 1,61E-04 |
| 242218_at    | peroxisome proliferator-activated receptor delta                                                             | 3,24 | 4,45E-05 |
| 204790_at    | SMAD family member 7                                                                                         | 3,23 | 5,16E-06 |
| 226140_s_at  | OTU domain containing 1                                                                                      | 3,21 | 9,85E-05 |
| 201531_at    | zinc finger protein 36, C3H type, homolog (mouse)                                                            | 3,19 | 3,64E-06 |
| 210663_s_at  | kynureninase (L-kynurenine hydrolase)                                                                        | 3,17 | 7,51E-04 |
| 225798_at    | JAZF zinc finger 1                                                                                           | 3,15 | 7,61E-05 |
| 204834_at    | fibrinogen-like 2                                                                                            | 3,13 | 9,15E-04 |
| 214467_at    | G protein-coupled receptor 65                                                                                | 3,12 | 2,54E-06 |
| 229521_at    | hypothetical protein FLJ36031                                                                                | 3,11 | 7,92E-07 |
| 205686_s_at  | CD86 molecule                                                                                                | 3,09 | 7,51E-04 |
| 209037_s_at  | EH-domain containing 1                                                                                       | 3,09 | 1,26E-04 |
| 203708_at    | phosphodiesterase 4B, cAMP-specific (phosphodiesterase E4 dunce homolog, Drosophila)                         | 3,09 | 1,61E-04 |
| 210042_s_at  | cathepsin Z                                                                                                  | 3,08 | 2,05E-04 |
| 221765_at    | UDP-glucose ceramide glucosyltransferase                                                                     | 3,08 | 1,87E-05 |
| 224967_at    | UDP-glucose ceramide glucosyltransferase                                                                     | 3,08 | 5,22E-07 |
| 223405_at    | N-acetylneuraminate pyruvate lyase (dihydrodipicolinate synthase)                                            | 3,06 | 1,61E-04 |
| 213274_s_at  | cathepsin B                                                                                                  | 3,00 | 4,45E-05 |
| 208540_x_at  | S100 calcium binding protein A11; S100 calcium binding protein A11 pseudogene                                | 3,00 | 7,51E-04 |
| 225142_at    | jumonji C domain containing histone demethylase 1 homolog D (S. cerevisiae)                                  | 2,98 | 5,16E-06 |
| 1568955_at   | SLIT-ROBO Rho GTPase activating protein 2 pseudogene 1                                                       | 2,97 | 9,15E-04 |
| 203535_at    | S100 calcium binding protein A9                                                                              | 2,96 | 7,51E-04 |
| 211991_s_at  | major histocompatibility complex, class II, DP alpha 1                                                       | 2,94 | 3,23E-04 |
| 202896_s_at  | signal-regulatory protein alpha                                                                              | 2,92 | 9,15E-04 |
| 203388_at    | arrestin, beta 2                                                                                             | 2,92 | 7,61E-05 |
| 205685_at    | CD86 molecule                                                                                                | 2,91 | 2,58E-04 |
| 205786_s_at  | integrin, alpha M (complement component 3 receptor 3 subunit)                                                | 2,89 | 2,05E-04 |
| 206420_at    | immunoglobulin superfamily, member 6                                                                         | 2,89 | 6,13E-04 |
| 224583_at    | coactosin-like 1 (Dictyostelium)                                                                             | 2,88 | 3,36E-05 |
| 211810_s_at  | galactosylceramidase                                                                                         | 2,88 | 2,58E-04 |
| 211133_x_at  | leukocyte immunoglobulin-like receptor, subfamily B (with TM and ITIM domains), member 3                     | 2,86 | 7,51E-04 |
| 231035_s_at  | OTU domain containing 1                                                                                      | 2,85 | 4,02E-04 |
| 232617_at    | cathepsin S                                                                                                  | 2,85 | 9,85E-05 |
| 223922_x_at  | membrane-spanning 4-domains, subfamily A, member 6A                                                          | 2,84 | 9,15E-04 |
| 229067_at    | SLIT-ROBO Rho GTPase activating protein 2 pseudogene 1                                                       | 2,83 | 2,05E-04 |
| 210360_s_at  | metastasis suppressor 1                                                                                      | 2,82 | 6,13E-04 |
| 215193_x_at  | major histocompatibility complex, class II, DR beta 3                                                        | 2,82 | 1,61E-04 |
| 211764_s_at  | ubiquitin-conjugating enzyme E2D 1 (UBC4/5 homolog, yeast)                                                   | 2,78 | 6,13E-04 |
| 211302_s_at  | phosphodiesterase 4B, cAMP-specific (phosphodiesterase E4 dunce homolog, Drosophila)                         | 2,78 | 7,51E-04 |
| 213002_at    | myristoylated alanine-rich protein kinase C substrate                                                        | 2,77 | 7,51E-04 |
| 212830_at    | multiple EGF-like-domains 9                                                                                  | 2,76 | 9,15E-04 |
| 214696_at    | chromosome 17 open reading frame 91                                                                          | 2,74 | 1,38E-05 |
| 204867_at    | GTP cyclohydrolase I feedback regulator                                                                      | 2,74 | 7,92E-07 |
| 226756_at    | hypothetical protein FLJ36031                                                                                | 2,74 | 1,87E-05 |
| 208891_at    | dual specificity phosphatase 6                                                                               | 2,74 | 6,13E-04 |
| 1555419_a_at | N-acylsphingosine amidohydrolase (acid ceramidase) 1                                                         | 2,73 | 2,58E-04 |
| 221059_s_at  | coactosin-like 1 (Dictyostelium)                                                                             | 2,73 | 2,05E-04 |
| 221920_s_at  | solute carrier family 25, member 37                                                                          | 2,73 | 1,38E-05 |
| 211458_s_at  | GABA(A) receptors associated protein like 3 (pseudogene); GABA(A) receptor-associated protein like 1         | 2,72 | 2,52E-05 |
| 208306_x_at  | major histocompatibility complex, class II, DR beta 4; major histocompatibility complex, class II, DR beta 1 | 2,71 | 1,38E-05 |
| 226464_at    | chromosome 3 open reading frame 58                                                                           | 2,71 | 1,18E-06 |
| 215435_at    | ArfGAP with SH3 domain, ankyrin repeat and PH domain 1                                                       | 2,71 | 4,97E-04 |
| 202201_at    | biliverdin reductase B (flavin reductase (NADPH))                                                            | 2,70 | 6,13E-04 |
| 240118_at    | thioredoxin domain containing 11                                                                             | 2,68 | 1,26E-04 |
| 200871_s_at  | prosaposin                                                                                                   | 2,67 | 2,58E-04 |
| 226952_at    | ELL associated factor 1                                                                                      | 2,66 | 2,05E-04 |

|              |                                                                                                                                                             |      |          |
|--------------|-------------------------------------------------------------------------------------------------------------------------------------------------------------|------|----------|
| 216248_s_at  | nuclear receptor subfamily 4, group A, member 2                                                                                                             | 2,66 | 2,58E-04 |
| 209312_x_at  | major histocompatibility complex, class II, DR beta 4; major histocompatibility complex, class II, DR beta 1                                                | 2,66 | 9,85E-05 |
| 219358_s_at  | ArfGAP with dual PH domains 2                                                                                                                               | 2,64 | 6,13E-04 |
| 201360_at    | cystatin C                                                                                                                                                  | 2,64 | 3,23E-04 |
| 226179_at    | solute carrier family 25, member 37                                                                                                                         | 2,64 | 9,85E-05 |
| 219622_at    | RAB20, member RAS oncogene family                                                                                                                           | 2,64 | 1,26E-04 |
| 201565_s_at  | inhibitor of DNA binding 2, dominant negative helix-loop-helix protein                                                                                      | 2,63 | 1,00E-05 |
| 1555638_a_at | SAM domain, SH3 domain and nuclear localization signals 1                                                                                                   | 2,63 | 4,97E-04 |
| 1553137_s_at | Kruppel-like factor 11                                                                                                                                      | 2,62 | 7,92E-07 |
| 204621_s_at  | nuclear receptor subfamily 4, group A, member 2                                                                                                             | 2,62 | 9,15E-04 |
| 227961_at    | cathepsin B                                                                                                                                                 | 2,60 | 4,97E-04 |
| 1557797_a_at | zinc finger E-box binding homeobox 2                                                                                                                        | 2,59 | 4,02E-04 |
| 209535_s_at  | A kinase (PRKA) anchor protein 13                                                                                                                           | 2,59 | 1,34E-07 |
| 211729_x_at  | biliverdin reductase A                                                                                                                                      | 2,58 | 9,15E-04 |
| 208892_s_at  | dual specificity phosphatase 6                                                                                                                              | 2,58 | 4,97E-04 |
| 224964_s_at  | guanine nucleotide binding protein (G protein), gamma 2                                                                                                     | 2,58 | 3,23E-04 |
| 222221_x_at  | EH-domain containing 1                                                                                                                                      | 2,57 | 1,61E-04 |
| 228685_at    | hypothetical protein LOC150166                                                                                                                              | 2,55 | 3,23E-04 |
| 204670_x_at  | major histocompatibility complex, class II, DR beta 4; major histocompatibility complex, class II, DR beta 1                                                | 2,55 | 1,26E-04 |
| 204417_at    | galactosylceramidase                                                                                                                                        | 2,55 | 1,74E-06 |
| 225955_at    | meteorin, glial cell differentiation regulator-like; similar to meteorin, glial cell differentiation regulator-like                                         | 2,55 | 4,02E-04 |
| 200839_s_at  | cathepsin B                                                                                                                                                 | 2,55 | 4,97E-04 |
| 217362_x_at  | major histocompatibility complex, class II, DR beta 6 (pseudogene)                                                                                          | 2,54 | 1,00E-05 |
| 228555_at    | calcium/calmodulin-dependent protein kinase II delta                                                                                                        | 2,54 | 3,23E-04 |
| 204118_at    | CD48 molecule                                                                                                                                               | 2,54 | 9,85E-05 |
| 204122_at    | TYRO protein tyrosine kinase binding protein                                                                                                                | 2,53 | 7,61E-05 |
| 213733_at    | myosin IF                                                                                                                                                   | 2,52 | 1,26E-04 |
| 1553134_s_at | chromosome 9 open reading frame 72                                                                                                                          | 2,52 | 6,13E-04 |
| 1565598_at   | RNA binding motif protein 47                                                                                                                                | 2,51 | 1,61E-04 |
| 212737_at    | GM2 ganglioside activator                                                                                                                                   | 2,51 | 2,58E-04 |
| 239331_at    |                                                                                                                                                             | 2,51 | 9,15E-04 |
| 222326_at    | phosphodiesterase 4B, cAMP-specific (phosphodiesterase E4 dunce homolog, Drosophila)                                                                        | 2,51 | 2,58E-04 |
| 207224_s_at  | sialic acid binding Ig-like lectin 7                                                                                                                        | 2,50 | 4,97E-04 |
| 236248_x_at  | transcriptional adaptor 2 (ADA2 homolog, yeast)-beta                                                                                                        | 2,49 | 4,02E-04 |
| 225252_at    | sulfiredoxin 1 homolog (S. cerevisiae)                                                                                                                      | 2,49 | 1,61E-04 |
| 239105_at    |                                                                                                                                                             | 2,48 | 1,00E-05 |
| 219582_at    | opioid growth factor receptor-like 1                                                                                                                        | 2,48 | 3,38E-07 |
| 204622_x_at  | nuclear receptor subfamily 4, group A, member 2                                                                                                             | 2,47 | 2,58E-04 |
| 206028_s_at  | c-mer proto-oncogene tyrosine kinase                                                                                                                        | 2,47 | 9,15E-04 |
| 220987_s_at  | chromosome 11 open reading frame 17                                                                                                                         | 2,45 | 7,23E-06 |
| 203507_at    | similar to eukaryotic translation initiation factor 4A; small nucleolar RNA, H/ACA box 67; eukaryotic translation initiation factor 4A, isoform 1           | 2,44 | 4,97E-04 |
| 215671_at    | phosphodiesterase 4B, cAMP-specific (phosphodiesterase E4 dunce homolog, Drosophila)                                                                        | 2,44 | 4,02E-04 |
| 216942_s_at  | CD58 molecule                                                                                                                                               | 2,44 | 2,58E-04 |
| 226810_at    | opioid growth factor receptor-like 1                                                                                                                        | 2,43 | 7,61E-05 |
| 226240_at    | transcriptional adaptor 2 (ADA2 homolog, yeast)-beta                                                                                                        | 2,43 | 2,52E-05 |
| 200787_s_at  | phosphoprotein enriched in astrocytes 15                                                                                                                    | 2,42 | 3,36E-05 |
| 218611_at    | immediate early response 5                                                                                                                                  | 2,42 | 2,54E-06 |
| 203217_s_at  | ST3 beta-galactoside alpha-2,3-sialyltransferase 5                                                                                                          | 2,42 | 5,16E-06 |
| 212658_at    | lipoma HMGIC fusion partner-like 2                                                                                                                          | 2,41 | 2,58E-04 |
| 210176_at    | toll-like receptor 1                                                                                                                                        | 2,41 | 1,61E-04 |
| 227897_at    | RAP2B, member of RAS oncogene family                                                                                                                        | 2,40 | 5,84E-05 |
| 216336_x_at  | metallothionein 1L (gene/pseudogene); metallothionein 1E; metallothionein 1 pseudogene 3; metallothionein 1J (pseudogene)                                   | 2,40 | 3,23E-04 |
| 238469_at    | opioid growth factor receptor-like 1                                                                                                                        | 2,40 | 3,64E-06 |
| 242335_at    | solute carrier family 25, member 37                                                                                                                         | 2,40 | 2,52E-05 |
| 211990_at    | major histocompatibility complex, class II, DP alpha 1                                                                                                      | 2,40 | 1,26E-04 |
| 225604_s_at  | GLI pathogenesis-related 2                                                                                                                                  | 2,38 | 6,13E-04 |
| 220566_at    | phosphoinositide-3-kinase, regulatory subunit 5                                                                                                             | 2,38 | 1,87E-05 |
| 235479_at    | cytoplasmic polyadenylation element binding protein 2                                                                                                       | 2,37 | 1,61E-04 |
| 201926_s_at  | CD55 molecule, decay accelerating factor for complement (Cromer blood group)                                                                                | 2,37 | 7,23E-06 |
| 208894_at    | major histocompatibility complex, class II, DR alpha                                                                                                        | 2,37 | 2,58E-04 |
| 1559249_at   | ataxin 1                                                                                                                                                    | 2,36 | 4,45E-05 |
| 1552807_a_at | sialic acid binding Ig-like lectin 10                                                                                                                       | 2,35 | 1,61E-04 |
| 221718_s_at  | A kinase (PRKA) anchor protein 13                                                                                                                           | 2,35 | 5,84E-05 |
| 202205_at    | vasodilator-stimulated phosphoprotein                                                                                                                       | 2,35 | 1,61E-04 |
| 208869_s_at  | GABA(A) receptors associated protein like 3 (pseudogene); GABA(A) receptor-associated protein like 1                                                        | 2,35 | 2,05E-04 |
| 223553_s_at  | docking protein 3                                                                                                                                           | 2,33 | 2,05E-04 |
| 221840_at    | protein tyrosine phosphatase, receptor type, E                                                                                                              | 2,32 | 1,61E-04 |
| 230492_s_at  | hypothetical protein KIAA1434                                                                                                                               | 2,32 | 6,13E-04 |
| 201543_s_at  | SAR1 homolog A (S. cerevisiae)                                                                                                                              | 2,32 | 7,51E-04 |
| 202901_x_at  | cathepsin S                                                                                                                                                 | 2,32 | 4,97E-04 |
| 1556385_at   | cardiotrophin-like cytokine factor 1                                                                                                                        | 2,32 | 7,61E-05 |
| 243819_at    | guanine nucleotide binding protein (G protein), gamma 2                                                                                                     | 2,31 | 4,45E-05 |
| 207072_at    | interleukin 18 receptor accessory protein                                                                                                                   | 2,31 | 4,02E-04 |
| 1555950_a_at | CD55 molecule, decay accelerating factor for complement (Cromer blood group)                                                                                | 2,30 | 2,54E-06 |
| 216218_s_at  | phospholipase C-like 2                                                                                                                                      | 2,29 | 9,15E-04 |
| 213988_s_at  | spermidine/spermine N1-acetyltransferase 1                                                                                                                  | 2,28 | 9,15E-04 |
| 210982_s_at  | major histocompatibility complex, class II, DR alpha                                                                                                        | 2,28 | 2,05E-04 |
| 227935_s_at  | polycomb group ring finger 5                                                                                                                                | 2,28 | 7,61E-05 |
| 202192_s_at  | growth arrest-specific 7                                                                                                                                    | 2,27 | 7,61E-05 |
| 212432_at    | GrpE-like 1, mitochondrial (E. coli)                                                                                                                        | 2,27 | 2,52E-05 |
| 208868_s_at  | GABA(A) receptors associated protein like 3 (pseudogene); GABA(A) receptor-associated protein like 1                                                        | 2,27 | 3,23E-04 |
| 214211_at    | ferritin, heavy polypeptide 1; ferritin, heavy polypeptide-like 16; similar to ferritin, heavy polypeptide 1; ferritin, heavy polypeptide-like 3 pseudogene | 2,27 | 7,51E-04 |

|              |                                                                                                                                       |      |          |
|--------------|---------------------------------------------------------------------------------------------------------------------------------------|------|----------|
| 229756_at    |                                                                                                                                       | 2,27 | 4,45E-05 |
| 211744_s_at  | CD58 molecule                                                                                                                         | 2,27 | 1,61E-04 |
| 234574_at    | myosin IF                                                                                                                             | 2,27 | 1,61E-04 |
| 217168_s_at  | homocysteine-inducible, endoplasmic reticulum stress-inducible, ubiquitin-like domain member 1                                        | 2,26 | 5,84E-05 |
| 208872_s_at  | receptor accessory protein 5                                                                                                          | 2,26 | 9,85E-05 |
| 212907_at    | solute carrier family 30 (zinc transporter), member 1                                                                                 | 2,26 | 9,15E-04 |
| 229733_s_at  | chromobox homolog 6                                                                                                                   | 2,25 | 6,13E-04 |
| 220330_s_at  | SAM domain, SH3 domain and nuclear localization signals 1                                                                             | 2,24 | 4,97E-04 |
| 244492_at    | Src-like-adaptor                                                                                                                      | 2,24 | 2,52E-05 |
| 242738_s_at  | zinc finger homeobox 3; hypothetical LOC100132068                                                                                     | 2,24 | 9,15E-04 |
| 206571_s_at  | mitogen-activated protein kinase kinase kinase kinase 4                                                                               | 2,23 | 2,54E-06 |
| 1559018_at   | protein tyrosine phosphatase, receptor type, E                                                                                        | 2,22 | 1,00E-05 |
| 244235_at    | influenza virus NS1A binding protein                                                                                                  | 2,22 | 4,45E-05 |
| 217436_x_at  | major histocompatibility complex, class I, A                                                                                          | 2,22 | 2,05E-04 |
| 243931_at    | CD58 molecule                                                                                                                         | 2,22 | 1,61E-04 |
| 204638_at    | acid phosphatase 5, tartrate resistant                                                                                                | 2,21 | 6,07E-10 |
| 211404_s_at  | amyloid beta (A4) precursor-like protein 2                                                                                            | 2,21 | 9,15E-04 |
| 242263_at    | transmembrane emp24 protein transport domain containing 5                                                                             | 2,20 | 1,74E-06 |
| 201850_at    | capping protein (actin filament), gelsolin-like                                                                                       | 2,20 | 5,84E-05 |
| 242320_at    | forkhead box O3; forkhead box O3B pseudogene                                                                                          | 2,20 | 1,26E-04 |
| 243395_at    | CD55 molecule, decay accelerating factor for complement (Cromer blood group)                                                          | 2,19 | 1,87E-05 |
| 226657_at    | chromosome 17 open reading frame 103                                                                                                  | 2,17 | 9,15E-04 |
| 1556321_a_at |                                                                                                                                       | 2,16 | 4,45E-05 |
| 217741_s_at  | similar to zinc finger, AN1-type domain 5; zinc finger, AN1-type domain 5                                                             | 2,16 | 5,22E-07 |
| 226968_at    | kinesin family member 1B                                                                                                              | 2,16 | 1,61E-04 |
| 222507_s_at  | TMEM9 domain family, member B                                                                                                         | 2,16 | 4,97E-04 |
| 208683_at    | calpain 2, (m/II) large subunit                                                                                                       | 2,15 | 7,51E-04 |
| 217739_s_at  | nicotinamide phosphoribosyltransferase                                                                                                | 2,14 | 9,15E-04 |
| 224796_at    | ArfGAP with SH3 domain, ankyrin repeat and PH domain 1                                                                                | 2,14 | 2,05E-04 |
| 202445_s_at  | Notch homolog 2 (Drosophila)                                                                                                          | 2,14 | 2,05E-04 |
| 217868_s_at  | methyltransferase like 9                                                                                                              | 2,13 | 2,52E-05 |
| 204183_s_at  | adrenergic, beta, receptor kinase 2                                                                                                   | 2,13 | 1,38E-05 |
| 206302_s_at  | nudix (nucleoside diphosphate linked moiety X)-type motif 4; nudix (nucleoside diphosphate linked moiety X)-type motif 4 pseudogene 1 | 2,13 | 3,36E-05 |
| 204881_s_at  | UDP-glucose ceramide glucosyltransferase                                                                                              | 2,12 | 1,26E-04 |
| 236297_at    | chromosome 10 open reading frame 112                                                                                                  | 2,12 | 7,61E-05 |
| 225878_at    | kinesin family member 1B                                                                                                              | 2,11 | 2,58E-04 |
| 225582_at    | inositol 1,4,5-triphosphate receptor interacting protein                                                                              | 2,11 | 5,22E-07 |
| 221654_s_at  | ubiquitin specific peptidase 3                                                                                                        | 2,10 | 1,87E-05 |
| 226843_s_at  | PAP associated domain containing 5                                                                                                    | 2,10 | 3,38E-07 |
| 204194_at    | BTB and CNC homology 1, basic leucine zipper transcription factor 1                                                                   | 2,09 | 1,26E-04 |
| 204088_at    | purinergic receptor P2X, ligand-gated ion channel, 4                                                                                  | 2,09 | 3,23E-04 |
| 219155_at    | phosphatidylinositol transfer protein, cytoplasmic 1                                                                                  | 2,09 | 2,54E-06 |
| 224826_at    | hypothetical protein KIAA1434                                                                                                         | 2,09 | 4,97E-04 |
| 244485_at    | major histocompatibility complex, class II, DP beta 1                                                                                 | 2,09 | 9,15E-04 |
| 229043_at    | PAP associated domain containing 5                                                                                                    | 2,08 | 5,16E-06 |
| 204500_s_at  | ATP/GTP binding protein 1                                                                                                             | 2,08 | 2,58E-04 |
| 228284_at    | similar to transducin-like enhancer of split 1 (E(sp1) homolog, Drosophila); transducin-like enhancer of split 1 (E(s                 | 2,08 | 4,97E-04 |
| 201599_at    | ornithine aminotransferase (gyrate atrophy)                                                                                           | 2,07 | 4,45E-05 |
| 223482_at    | transmembrane protein 120A                                                                                                            | 2,07 | 7,51E-04 |
| 238063_at    | transmembrane protein 154                                                                                                             | 2,07 | 7,51E-04 |
| 238800_s_at  | zinc finger, CCHC domain containing 6                                                                                                 | 2,06 | 1,38E-05 |
| 226554_at    | zinc finger and BTB domain containing 7A                                                                                              | 2,06 | 2,05E-04 |
| 225251_at    | RAB24, member RAS oncogene family                                                                                                     | 2,06 | 6,13E-04 |
| 208914_at    | golgi associated, gamma adaptin ear containing, ARF binding protein 2                                                                 | 2,06 | 2,58E-04 |
| 36564_at     | ring finger protein 19B                                                                                                               | 2,06 | 9,85E-05 |
| 229054_at    | chromosome 14 open reading frame 181                                                                                                  | 2,05 | 3,23E-04 |
| 239404_at    | topoisomerase (DNA) I                                                                                                                 | 2,04 | 4,45E-05 |
| 221778_at    | jumonji C domain containing histone demethylase 1 homolog D (S. cerevisiae)                                                           | 2,04 | 4,97E-04 |
| 209124_at    | myeloid differentiation primary response gene (88)                                                                                    | 2,04 | 1,00E-05 |
| 242814_at    | serpin peptidase inhibitor, clade B (ovalbumin), member 9                                                                             | 2,03 | 7,51E-04 |
| 225738_at    | Rap guanine nucleotide exchange factor (GEF) 1                                                                                        | 2,03 | 3,36E-05 |
| 205547_s_at  | transgelin                                                                                                                            | 2,03 | 6,13E-04 |
| 214574_x_at  | leukocyte specific transcript 1                                                                                                       | 2,02 | 9,15E-04 |
| 223679_at    | catenin (cadherin-associated protein), beta 1, 88kDa                                                                                  | 2,02 | 9,15E-04 |

## Supplementary table legend

### Table S1

**Differentially expressed probe sets between high and low *IGFBP2* expression groups (q4 vs. q1)**

(A) Probe sets overexpressed in the high *IGFBP2* group. (B) Probe sets underexpressed in the high *IGFBP2* group.
